# Supplementary material for: Property–activity relations of multifunctional reactive ensembles in cation-exchanged zeolites: a case study of methane activation on Zn2+-modified zeolite BEA
Source: Royal Society of Chemistry journal article supplement (doi:10.1039/d1cp05854a), 2022-01-01
Supplement: d1cp05854a1.pdf [file d1cp05854a1.pdf]

## Supporting Information

# Property-Activity Relations of Multifunctional Reactive Ensembles in Cation-Exchanged Zeolites: A Case Study of Methane Activation on Zn<sup>2+</sup>- Modified Zeolite BEA

*Alexander A. Kolganov,<sup>1</sup> Anton A. Gabrienko,<sup>1</sup> Ivan Yu. Chernyshov,<sup>2</sup> Alexander G. Stepanov,<sup>1</sup>  
Evgeny A. Pidko<sup>3,4\*</sup>*

<sup>1</sup>Boreskov Institute of Catalysis, Siberian Branch of the Russian Academy of Sciences, Prospekt  
Akademika Lavrentieva 5, Novosibirsk 630090, Russia

<sup>2</sup>TheoMat group, ChemBio Cluster, ITMO University, Lomonosova 9, St. Petersburg, 191002,  
Russia

<sup>3</sup> Inorganic Systems Engineering group, Department of Chemical Engineering, Faculty of  
Applied Sciences, Delft University of Technology, Van der Maasweg 9, Delft 2629 HZ, The  
Netherlands

<sup>4</sup>TsyfroCatLab Group, University of Tyumen, Volodarskogo St.6, Tyumen 625003, Russia

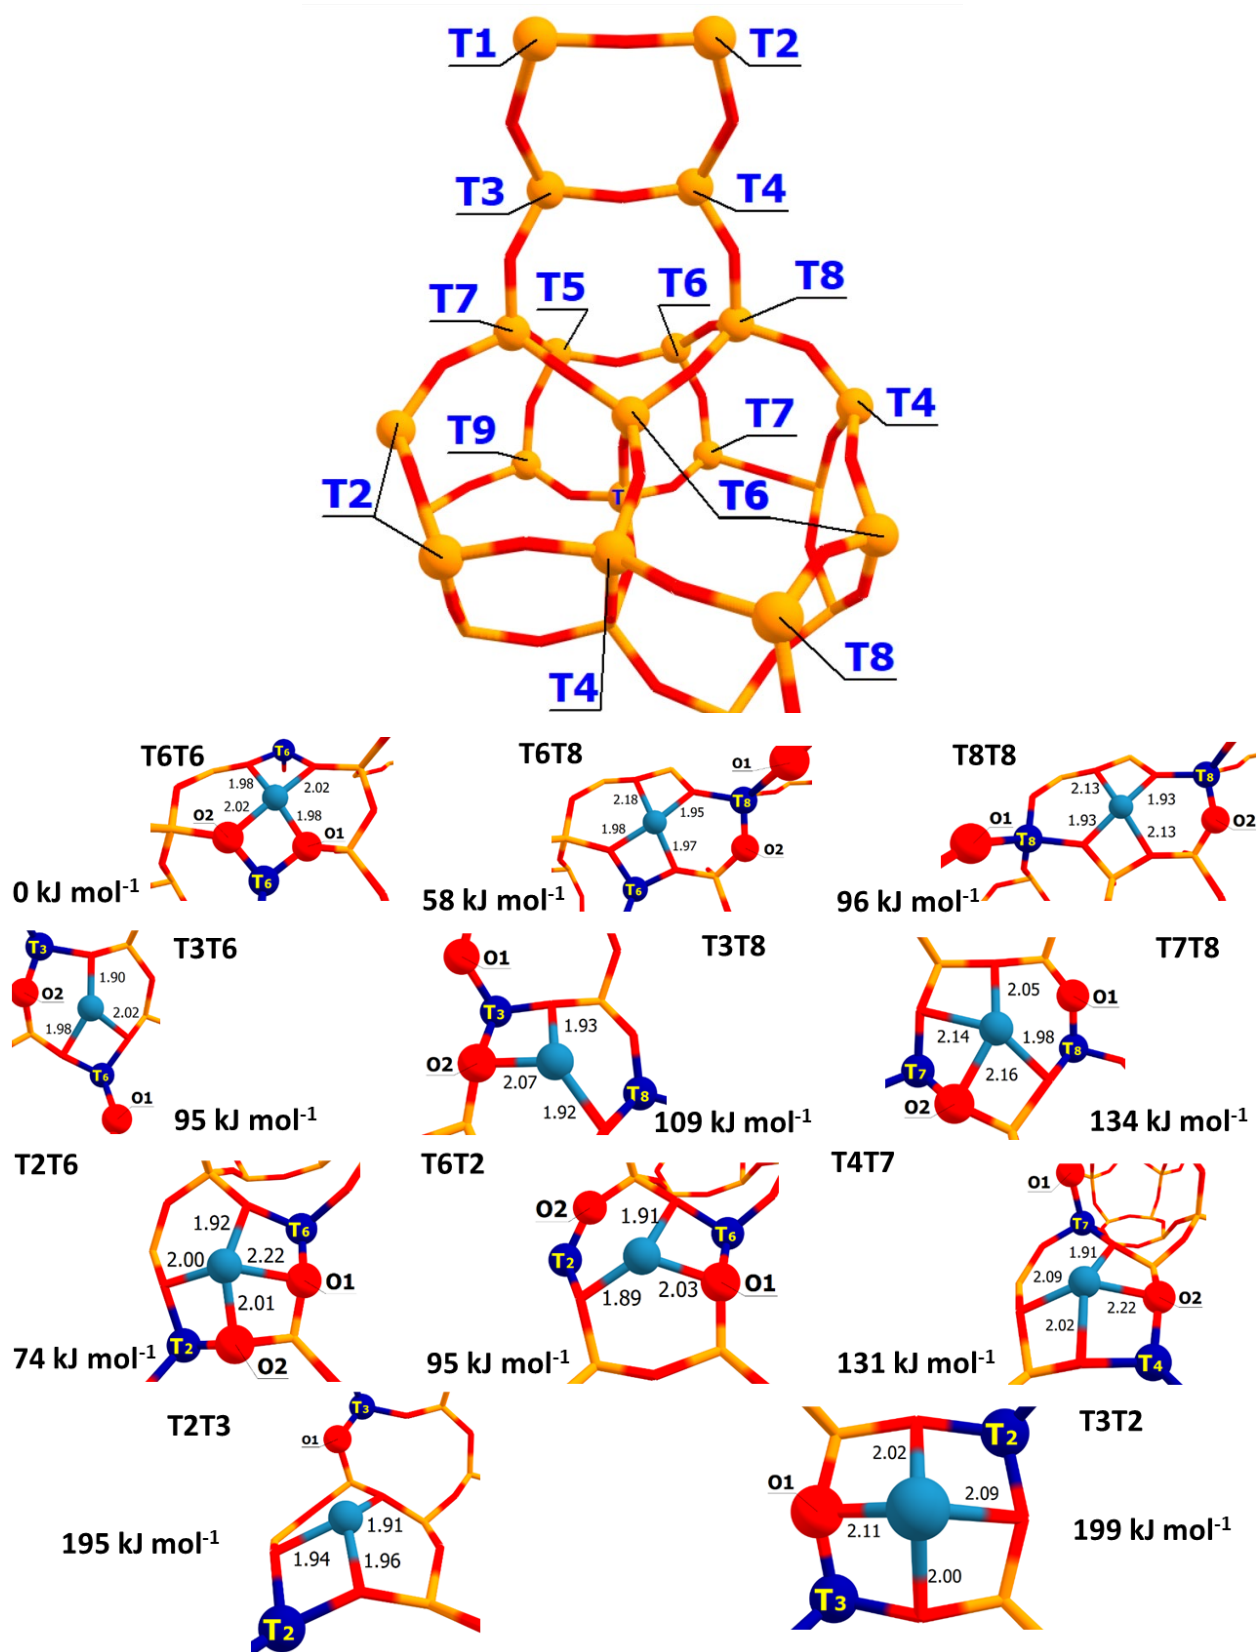

**Figure S1.** Different T sites in the BEA zeolite framework. Structure and relative stability of the Zn<sup>2+</sup> cations placed in different locations within the BEA zeolite framework. All distances are shown in Å

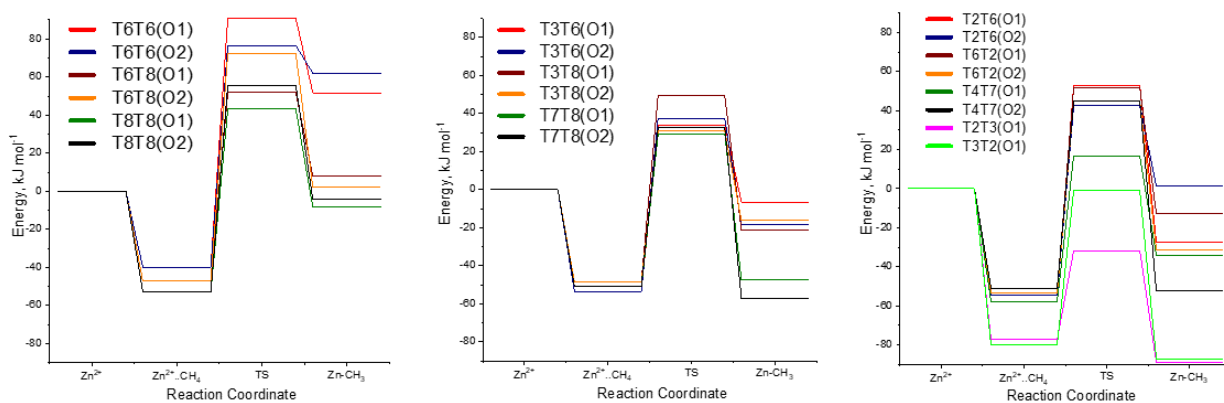

**Figure S2.** Energy diagrams for all considered methane activation reactions.

**Table S1.** Scaling coefficients for IR frequencies calculations

| CO( $\nu_{C=O}$ ) | CH <sub>3</sub> CN( $\nu_{C=N}$ ) | C <sub>5</sub> H <sub>5</sub> N( $\nu_{19}$ ) | CH <sub>4</sub> , ( $\nu_1$ ) | C <sub>4</sub> H <sub>4</sub> NH( $\nu_{N-H}$ ) | CH <sub>3</sub> CCH ( $\nu_{C-H}$ ) |
|-------------------|-----------------------------------|-----------------------------------------------|-------------------------------|-------------------------------------------------|-------------------------------------|
| 1.008             | 0.985                             | 1.011                                         | 0.978                         | 0.978                                           | 0.975                               |

**Table S2.** Relative zeolite model stabilities,  $\Delta E_{int}^\ddagger$ ,  $\Delta E_{app}^\ddagger$ ,  $\Delta E_r$  values and methane activation transition state imaginary frequencies for each considered Zn<sub>EF</sub><sup>2+</sup>...O<sub>F</sub><sup>2-</sup>.

| Configuration | Relative stability, kJ/mol | $\Delta E_{int}^\ddagger$ , kJ/mol | $\Delta E_{app}^\ddagger$ , kJ/mol | $\Delta E_r$ , kJ/mol | Imaginary frequencies, cm <sup>-1</sup> /i |
|---------------|----------------------------|------------------------------------|------------------------------------|-----------------------|--------------------------------------------|
| T6T6O1        | 0                          | 131                                | 91                                 | 52                    | 907                                        |
| T6T6O2        |                            | 117                                | 77                                 | 62                    | 788                                        |
| T6T8O1        | 58                         | 99                                 | 52                                 | 8                     | 1058                                       |
| T6T8O2        |                            | 120                                | 72                                 | 2                     | 920                                        |
| T8T8O1        | 96                         | 96                                 | 43                                 | -8                    | 1098                                       |
| T8T8O2        |                            | 109                                | 56                                 | -4                    | 901                                        |
| T3T6O1        | 95                         | 88                                 | 34                                 | -7                    | 1017                                       |
| T3T6O2        |                            | 91                                 | 37                                 | -19                   | 986                                        |
| T3T8O1        | 110                        | 98                                 | 49                                 | -26                   | 1025                                       |
| T3T8O2        |                            | 79                                 | 31                                 | -16                   | 963                                        |
| T7T8O1        | 134                        | 80                                 | 29                                 | -48                   | 998                                        |
| T7T8O2        |                            | 84                                 | 33                                 | -57                   | 1021                                       |
| T2T6O1        | 74                         | 107                                | 53                                 | -27                   | 961                                        |
| T2T6O2        |                            | 97                                 | 42                                 | 1                     | 1029                                       |
| T6T2O1        | 95                         | 105                                | 52                                 | -13                   | 992                                        |
| T6T2O2        |                            | 98                                 | 45                                 | -31                   | 1011                                       |
| T4T7O1        | 131                        | 74                                 | 17                                 | -34                   | 1052                                       |
| T4T7O2        |                            | 103                                | 45                                 | -52                   | 1020                                       |
| T2T3O1        | 195                        | 46                                 | -32                                | -89                   | 1011                                       |
| T3T2O1        | 199                        | 79                                 | -1                                 | -87                   | 1087                                       |

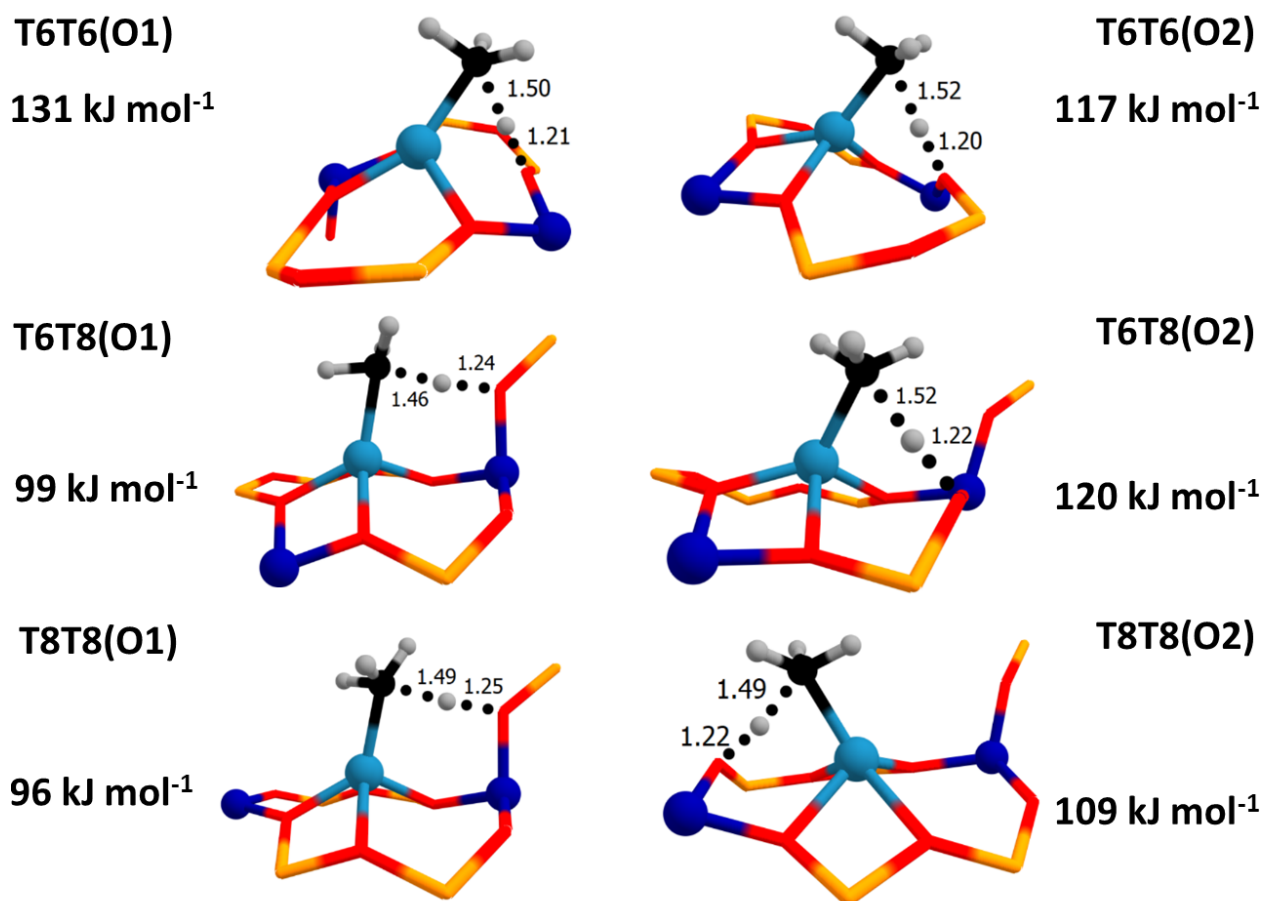

**Figure S3.** Geometries of the activation barriers of T6T6, T6T8 and T8T8 configuration.

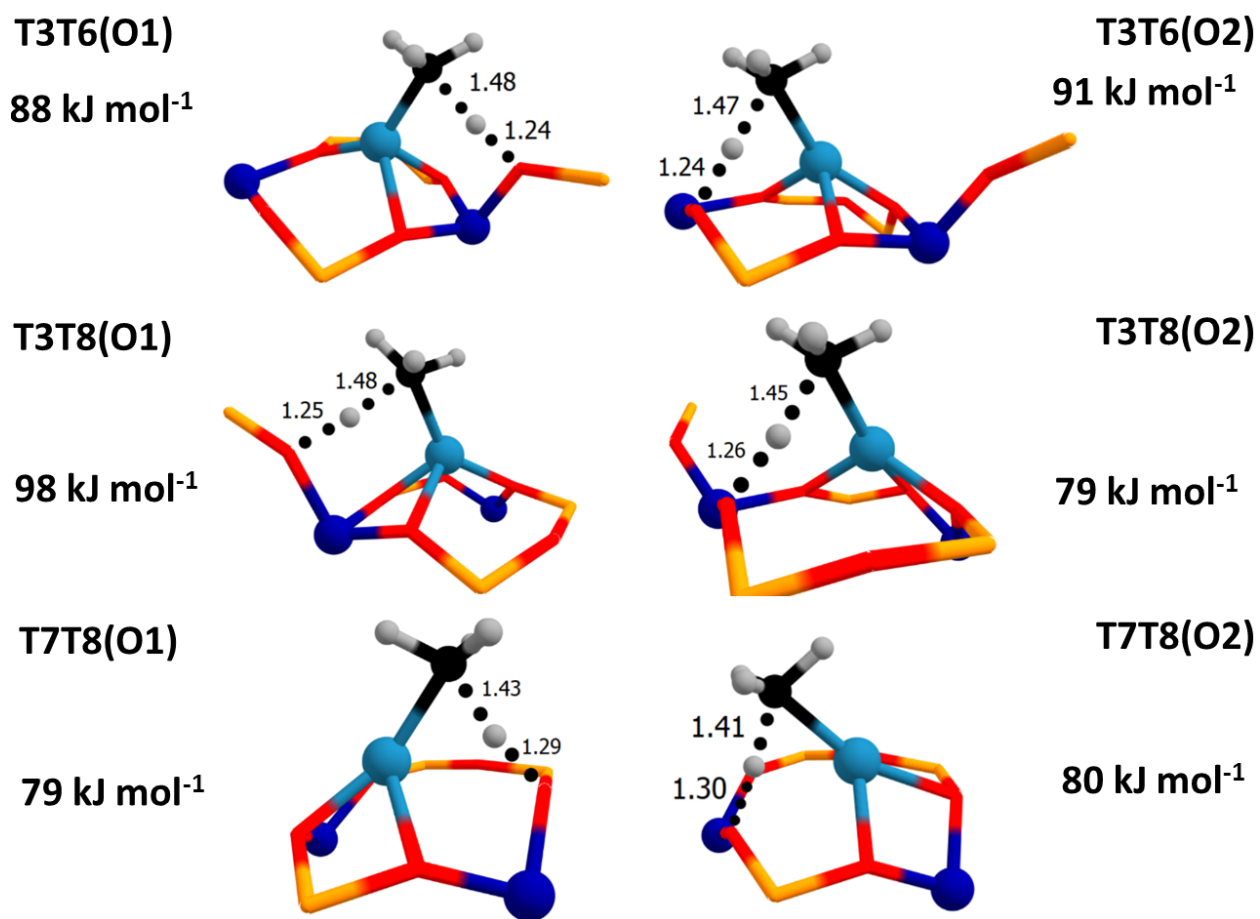

Figure S4. Geometries of the activation barriers of T3T6, T3T8 and T7T8 configurations.

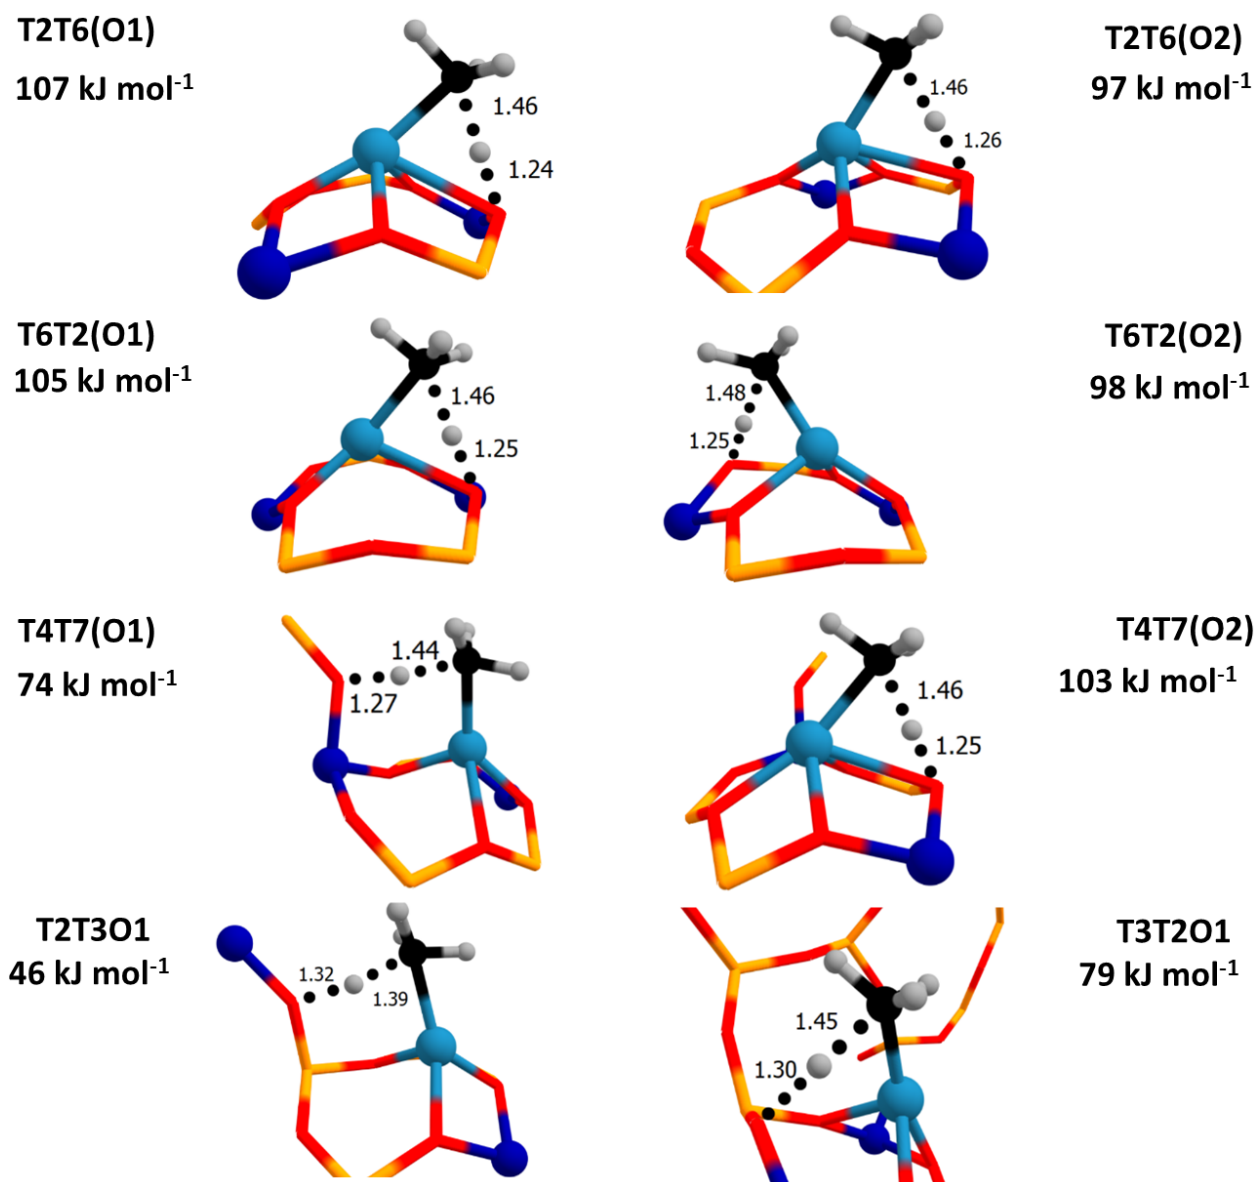

Figure S5. Geometries of the activation barriers of T2T6, T6T2, T4T7, T2T3 and T3T2 configurations.

**Table S3.** C–H and O<sub>z</sub>–H distances in transition states and respective bond orders. The O<sub>z</sub> denotes zeolite lattice oxygen atom.

| Configuration | d(C–H), Å | d(O–H), Å | Bond order (C–H) | Bond order (O–H) |
|---------------|-----------|-----------|------------------|------------------|
| T6T6O1        | 1.501     | 1.210     | 0.332            | 0.499            |
| T6T6O2        | 1.516     | 1.201     | 0.325            | 0.514            |
| T6T8O1        | 1.461     | 1.243     | 0.393            | 0.481            |
| T6T8O2        | 1.516     | 1.216     | 0.334            | 0.493            |
| T8T8O1        | 1.494     | 1.249     | 0.371            | 0.487            |
| T8T8O2        | 1.490     | 1.223     | 0.353            | 0.487            |
| T3T6O1        | 1.478     | 1.240     | 0.365            | 0.482            |
| T3T6O2        | 1.474     | 1.241     | 0.361            | 0.474            |
| T3T8O1        | 1.476     | 1.252     | 0.368            | 0.466            |
| T3T8O2        | 1.445     | 1.257     | 0.387            | 0.467            |
| T7T8O1        | 1.426     | 1.287     | 0.399            | 0.436            |
| T7T8O2        | 1.400     | 1.313     | 0.419            | 0.418            |
| T2T6O1        | 1.457     | 1.238     | 0.366            | 0.472            |
| T2T6O2        | 1.462     | 1.260     | 0.368            | 0.457            |
| T6T2O1        | 1.457     | 1.250     | 0.371            | 0.469            |
| T6T2O2        | 1.481     | 1.245     | 0.353            | 0.463            |
| T4T7O1        | 1.440     | 1.267     | 0.407            | 0.465            |
| T4T7O2        | 1.458     | 1.249     | 0.371            | 0.466            |
| T2T3O1        | 1.448     | 1.296     | 0.447            | 0.419            |
| T3T2O1        | 1.391     | 1.317     | 0.381            | 0.427            |

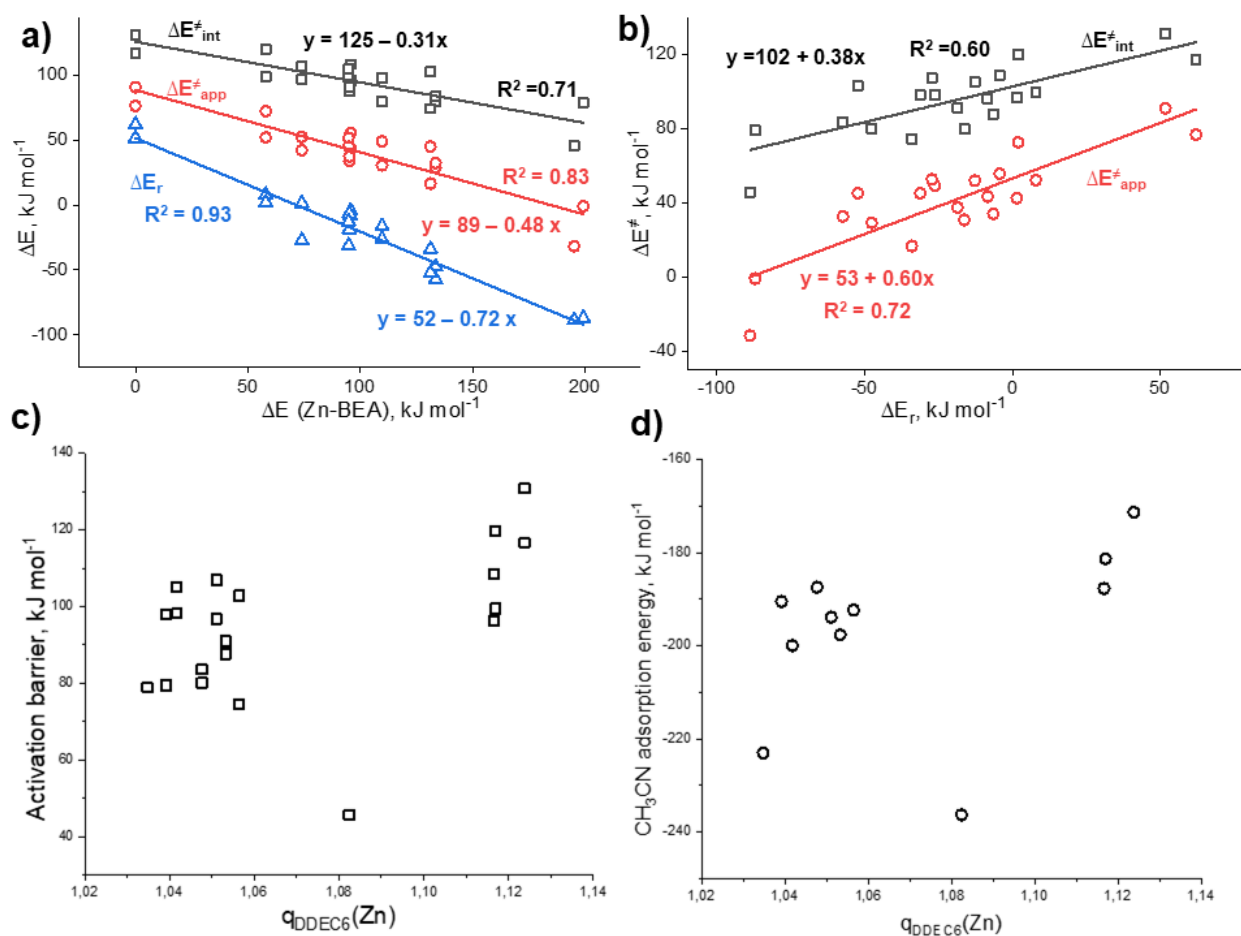

**Figure S6.** Correlations between the relative Zn-BEA stability and  $\Delta E_{\text{app}}^{\ddagger}$ ,  $\Delta E_{\text{int}}^{\ddagger}$ ,  $\Delta E_r$  (a). The relationships between the reaction energy and the activation barriers (b). The relationships between the DDEC6 charges on Zn atoms and methane activation barriers (c). The relationships between the DDEC6 charges on Zn atoms and CH<sub>3</sub>CN adsorption energies (d).



**Table S4.** Adsorption energies of the basic probes and CH<sub>4</sub>; DDEC6 charges of Zn atoms.

|      | CO                                                |                                                    | CH <sub>3</sub> CN                                |                                                    | C <sub>5</sub> H <sub>5</sub> N                   |                                                    | CH <sub>4</sub>                                   |                                                    | q <sub>DDEC6</sub> (Zn) |
|------|---------------------------------------------------|----------------------------------------------------|---------------------------------------------------|----------------------------------------------------|---------------------------------------------------|----------------------------------------------------|---------------------------------------------------|----------------------------------------------------|-------------------------|
|      | $\Delta E_{\text{ads}}$ ,<br>kJ/mol <sup>-1</sup> | $\Delta E_{\text{D3BJ}}$ ,<br>kJ/mol <sup>-1</sup> | $\Delta E_{\text{ads}}$ ,<br>kJ/mol <sup>-1</sup> | $\Delta E_{\text{D3BJ}}$ ,<br>kJ/mol <sup>-1</sup> | $\Delta E_{\text{ads}}$ ,<br>kJ/mol <sup>-1</sup> | $\Delta E_{\text{D3BJ}}$ ,<br>kJ/mol <sup>-1</sup> | $\Delta E_{\text{ads}}$ ,<br>kJ/mol <sup>-1</sup> | $\Delta E_{\text{D3BJ}}$ ,<br>kJ/mol <sup>-1</sup> |                         |
| T6T6 | -71                                               | -17                                                | -171                                              | -41                                                | -235                                              | -69                                                | -40                                               | -29                                                | 1.12                    |
| T6T8 | -80                                               | -17                                                | -181                                              | -41                                                | -242                                              | -69                                                | -47                                               | -28                                                | 1.12                    |
| T8T8 | -87                                               | -18                                                | -188                                              | -41                                                | -247                                              | -69                                                | -53                                               | -28                                                | 1.12                    |
| T3T6 | -90                                               | -16                                                | -198                                              | -45                                                | -254                                              | -60                                                | -54                                               | -26                                                | 1.05                    |
| T3T8 | -82                                               | -17                                                | -190                                              | -44                                                | -241                                              | -62                                                | -49                                               | -27                                                | 1.04                    |
| T7T8 | -82                                               | -18                                                | -187                                              | -45                                                | -243                                              | -60                                                | -51                                               | -28                                                | 1.05                    |
| T2T6 | -91                                               | -15                                                | -194                                              | -41                                                | -246                                              | -68                                                | -54                                               | -25                                                | 1.05                    |
| T6T2 | -92                                               | -14                                                | -200                                              | -40                                                | -243                                              | -64                                                | -53                                               | -23                                                | 1.04                    |
| T4T7 | -96                                               | -14                                                | -192                                              | -40                                                | -245                                              | -62                                                | -58                                               | -24                                                | 1.06                    |
| T2T3 | -120                                              | -17                                                | -236                                              | -44                                                | -280                                              | -65                                                | -77                                               | -26                                                | 1.08                    |
| T3T2 | -121                                              | -19                                                | -223                                              | -38                                                | -284                                              | -71                                                | -80                                               | -31                                                | 1.03                    |

**Table S5.** Selected geometrical parameters of the basic probes.

|      | CO            |           | CH <sub>3</sub> CN |           | C <sub>5</sub> H <sub>5</sub> N | CH <sub>4</sub> |
|------|---------------|-----------|--------------------|-----------|---------------------------------|-----------------|
|      | d(Zn-C),<br>Å | d(O-C), Å | d(Zn-N), Å         | d(C-N), Å | d(Zn-N), Å                      | d(Zn-C), Å      |
| T6T6 | 2.132         | 1.134     | 1.993              | 1.160     | 2.000                           | 2.500           |
| T6T8 | 2.115         | 1.133     | 1.970              | 1.158     | 1.983                           | 2.440           |
| T8T8 | 2.112         | 1.133     | 1.962              | 1.159     | 1.981                           | 2.396           |
| T3T6 | 2.075         | 1.133     | 1.945              | 1.159     | 1.989                           | 2.336           |
| T3T8 | 2.088         | 1.134     | 1.947              | 1.159     | 1.974                           | 2.399           |
| T7T8 | 2.097         | 1.134     | 1.953              | 1.158     | 1.981                           | 2.416           |
| T2T6 | 2.091         | 1.134     | 1.944              | 1.158     | 1.965                           | 2.388           |
| T6T2 | 2.069         | 1.133     | 1.932              | 1.159     | 1.953                           | 2.351           |
| T4T7 | 2.083         | 1.133     | 1.933              | 1.158     | 1.946                           | 2.334           |
| T2T3 | 2.044         | 1.133     | 1.912              | 1.159     | 1.929                           | 2.312           |
| T3T2 | 2.018         | 1.133     | 1.944              | 1.160     | 1.943                           | 2.227           |

**Table S6.** Scaled vibrational frequencies of the basic probes' adsorption complexes.

|      | CO                                 | CH <sub>3</sub> CN                             | C <sub>5</sub> H <sub>5</sub> N | CH <sub>4</sub>         |
|------|------------------------------------|------------------------------------------------|---------------------------------|-------------------------|
|      | $\nu_{\text{C=O}}, \text{cm}^{-1}$ | $\nu_{\text{C}\equiv\text{N}}, \text{cm}^{-1}$ | $\nu_{19}, \text{cm}^{-1}$      | $\nu_1, \text{cm}^{-1}$ |
| T6T6 | 2229                               | 2315                                           | 1498                            | 2870                    |
| T6T8 | 2238                               | 2328                                           | 1499                            | 2851                    |
| T8T8 | 2234                               | 2324                                           | 1499                            | 2858                    |
| T3T6 | 2233                               | 2326                                           | 1494                            | 2847                    |
| T3T8 | 2227                               | 2326                                           | 1496                            | 2853                    |
| T7T8 | 2224                               | 2327                                           | 1494                            | 2835                    |
| T2T6 | 2226                               | 2330                                           | 1498                            | 2824                    |
| T6T2 | 2235                               | 2326                                           | 1499                            | 2802                    |
| T4T7 | 2233                               | 2332                                           | 1497                            | 2798                    |
| T2T3 | 2239                               | 2315                                           | 1497                            | 2815                    |
| T3T2 | 2240                               | 2325                                           | 1496                            | 2735                    |

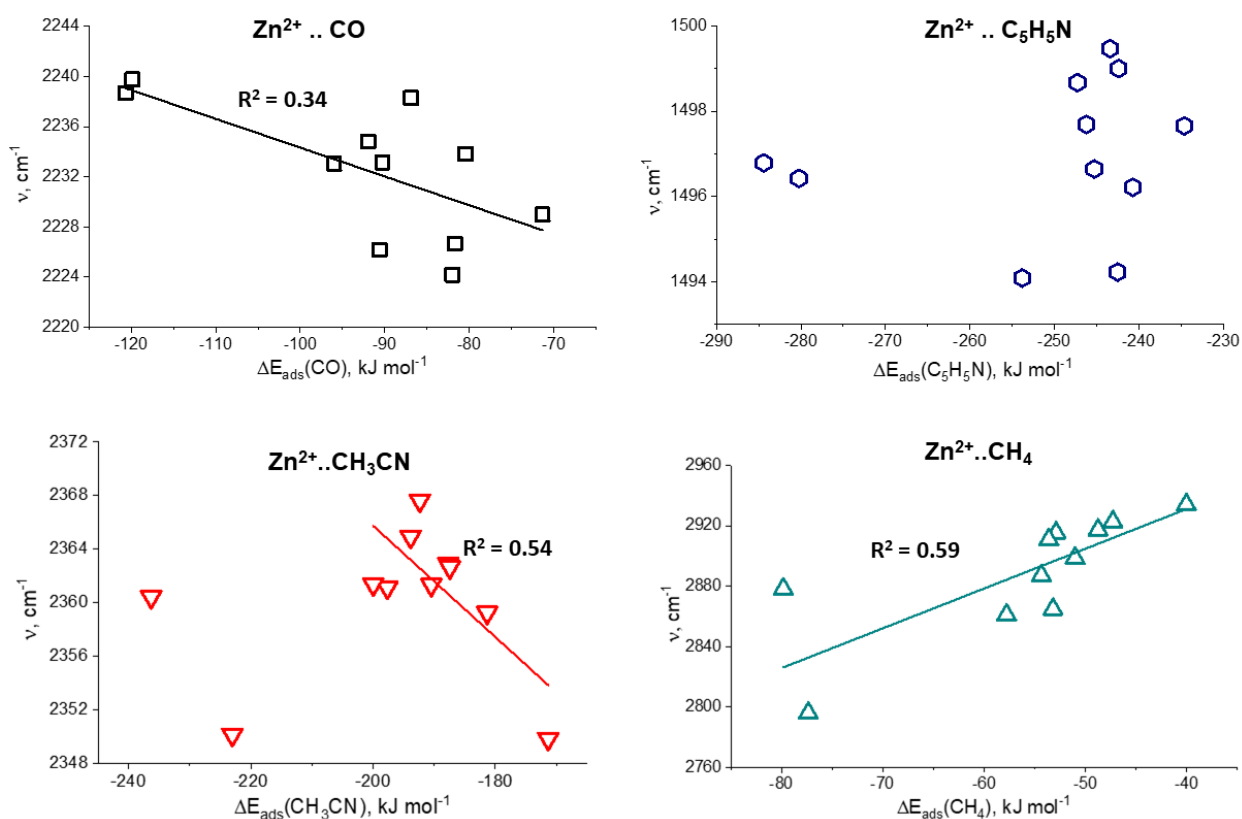

**Figure S7.** The relationships between adsorption energies of basic probes and respective vibrational frequencies.

Following vibrational modes, observed with FTIR technique, are considered:  $\nu_{C=O}$  stretching vibration for CO,  $\nu_{C\equiv N}$  stretching vibration for CH<sub>3</sub>CN,  $\nu_{19a}$  mode for pyridine, and  $\nu_1$  symmetric C-H stretching vibration for methane. We established the relations between the adsorption energies and respective vibrational frequencies. The related plots are shown in Figure S7. The calculated IR frequencies are listed in Table S6. We found that respective frequencies of CO and C<sub>5</sub>H<sub>5</sub>N do not correlate with adsorption energies indicating that these frequencies do not reflect the Zn<sup>2+</sup> adsorption energies. Interesting results obtained for relations between the adsorption energies of CH<sub>3</sub>CN and the  $\nu_{C\equiv N}$  stretching vibrations: there is linear correlation with  $R^2 = 0.54$  for relatively stable sites, with complete breaking of these relations for unstable (T2T3 and T3T2) sites. Finally, we observe the linear correlations with  $R^2 = 0.59$  for relations between the CH<sub>4</sub> adsorption energies and its  $\nu_1$  symmetric C-H stretching vibrations.

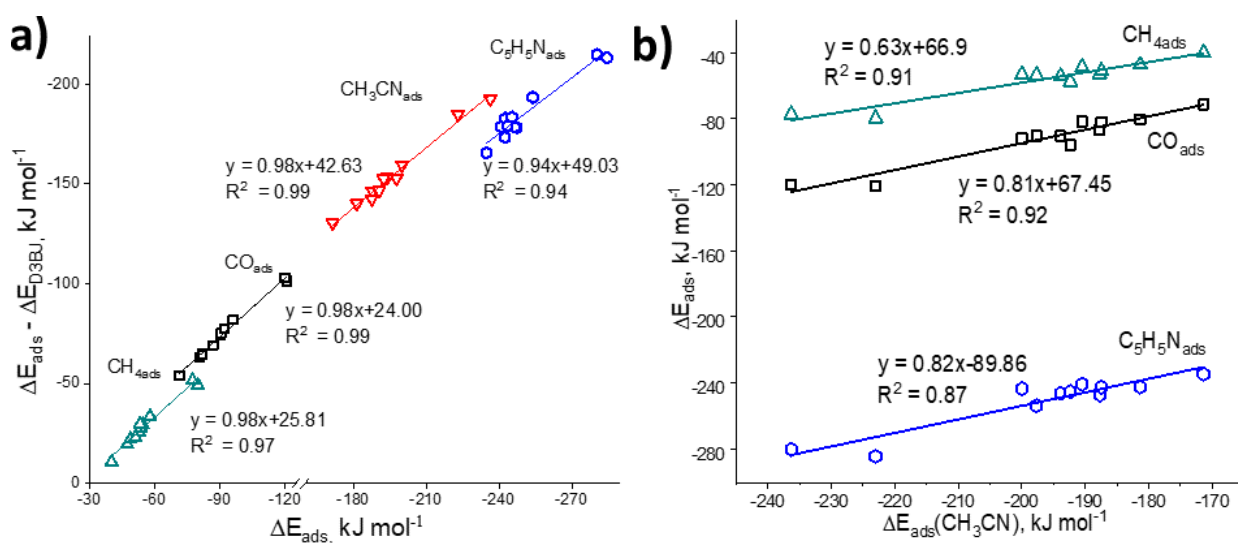

**Figure S8.** Demonstration of the dispersion effects on the probe adsorption energies for various locations in Zn-BEA zeolite (a). Computed adsorption energies of different basic probes in Zn-BEA zeolite as function of  $\Delta E_{\text{ads}}(\text{CH}_3\text{CN})$  (b).

The adsorption energies of these probes are affected not only by the basic strength of the probes and acidity of the Zn<sup>2+</sup>, but by the different molecular sizes and various local geometry surrounding the active sites.<sup>3</sup> We illustrated the effects of dispersion interactions by the

demonstration of the correlation between the dispersion-corrected ( $\Delta E_{\text{ads}}$ ) and -uncorrected ( $\Delta E_{\text{ads}} - \Delta E_{\text{D3BJ}}$ ) adsorption energy (Figure S8a). Dispersion interactions with the zeolite framework in case of small base molecules are insignificant, resulting in the correlations with  $R^2 = 0.99$ . However, in the case of pyridine adsorption complexes the dispersion effects are slightly disturbing the correlation, lowering the  $R^2$  coefficient to 0.94. Moreover, many points on pyridine graphic are concentrating in one area thus indicating that the local confinement around  $\text{Zn}^{2+}$  could affect pyridine adsorption energy significantly, potentially make pyridine less accurate probe to measure  $\text{Zn}^{2+}$  Lewis acidity. While interaction of the small base molecules with zeolite lattice is insignificant, the local confinement around  $\text{Zn}^{2+}$  could affect pyridine adsorption energy significantly, potentially make pyridine less accurate probe to measure  $\text{Zn}^{2+}$  Lewis acidity.

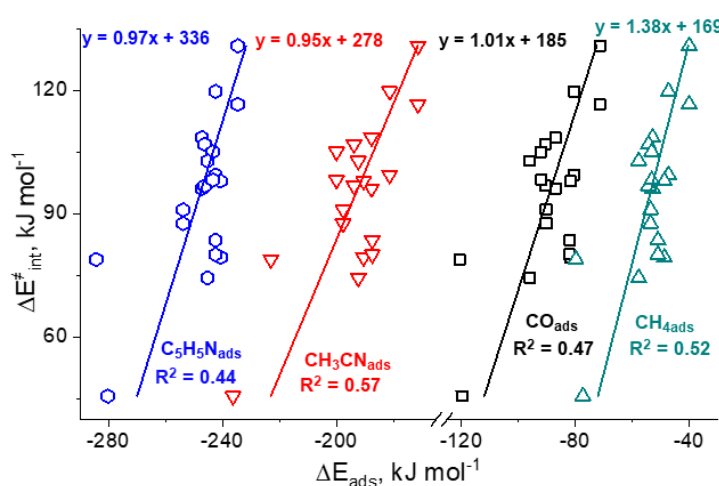

**Figure S9.** The relations between the activation barriers and  $\Delta E_{\text{ads}}$  of basic probes.

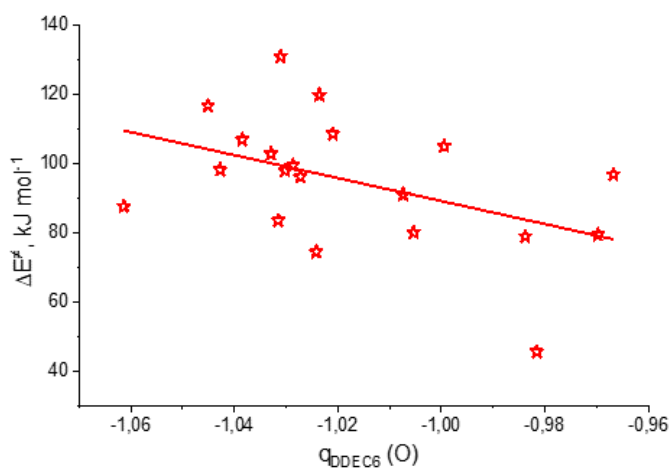

**Figure S10.** Relations between activation barriers and DDEC6 charges of O atoms (a) or hydrogen affinity (b).

**Table S7.**  $E_{\text{H}}$  and  $q_{\text{DDEC6}}(\text{O})$  values.

| Configuration | $E_{\text{H}}, \text{kJ/mol}$ | $q_{\text{DDEC6}}(\text{O})$ | Configuration | $E_{\text{H}}$ | $q_{\text{DDEC6}}(\text{O})$ |
|---------------|-------------------------------|------------------------------|---------------|----------------|------------------------------|
| T6T6O1        | 277                           | -1.03                        | T7T8O1        | 165            | -1.01                        |
| T6T6O2        | 302                           | -1.05                        | T7T8O2        | 150            | -1.03                        |
| T6T8O1        | 205                           | -1.03                        | T2T6O1        | 168            | -1.04                        |
| T6T8O2        | 199                           | -1.02                        | T2T6O2        | 195            | -0.97                        |
| T8T8O1        | 191                           | -1.03                        | T6T2O1        | 187            | -1.00                        |
| T8T8O2        | 193                           | -1.02                        | T6T2O2        | 166            | -1.04                        |
| T3T6O1        | 191                           | -1.06                        | T4T7O1        | 163            | -1.02                        |
| T3T6O2        | 178                           | -1.01                        | T4T7O2        | 145            | -1.03                        |
| T3T8O1        | 172                           | -1.03                        | T2T3O1        | 114            | -0.98                        |
| T3T8O2        | 180                           | -0.97                        | T3T2O1        | 116            | -0.98                        |

**Table S8.** Adsorption energies and selected geometrical of pyrrole and methylacetylene adsorption complexes. The N–H bond orders of the pyrrole are also listed. The O<sub>z</sub> denotes zeolite oxygen atom.

|        | Pyrrole                                           |                                                    |              |                            |                        | Methylacetylene                                   |                                                    |              |                            |
|--------|---------------------------------------------------|----------------------------------------------------|--------------|----------------------------|------------------------|---------------------------------------------------|----------------------------------------------------|--------------|----------------------------|
|        | $\Delta E_{\text{ads}}$ ,<br>kJ/mol <sup>-1</sup> | $\Delta E_{\text{D3BJ}}$ ,<br>kJ/mol <sup>-1</sup> | d(N–H),<br>Å | d(H–O <sub>z</sub> ),<br>Å | Bond<br>order<br>(N–H) | $\Delta E_{\text{ads}}$ ,<br>kJ/mol <sup>-1</sup> | $\Delta E_{\text{D3BJ}}$ ,<br>kJ/mol <sup>-1</sup> | d(C–H),<br>Å | d(H–O <sub>z</sub> ),<br>Å |
| T6T6O1 | -103                                              | -64                                                | 1.029        | 2.352                      | 0.746                  | -68                                               | -37                                                | 1.081        | 2.505                      |
| T6T6O2 | -116                                              | -60                                                | 1.030        | 2.370                      | 0.741                  | -114                                              | -39                                                | 1.082        | 2.608                      |
| T6T8O1 | -154                                              | -57                                                | 1.060        | 1.780                      | 0.691                  | -129                                              | -39                                                | 1.119        | 1.838                      |
| T6T8O2 | -101                                              | -62                                                | 1.037        | 2.351                      | 0.728                  | -125                                              | -39                                                | 1.087        | 2.543                      |
| T8T8O1 | -148                                              | -57                                                | 1.053        | 1.828                      | 0.709                  | -158                                              | -42                                                | 1.104        | 1.875                      |
| T8T8O2 | -132                                              | -64                                                | 1.039        | 2.128                      | 0.728                  | *                                                 | *                                                  | *            | *                          |
| T3T6O1 | -156                                              | -62                                                | 1.044        | 1.892                      | 0.718                  | -162                                              | -47                                                | 1.091        | 1.998                      |
| T3T6O2 | -145                                              | -66                                                | 1.037        | 2.108                      | 0.720                  | -137                                              | -44                                                | 1.089        | 2.218                      |
| T3T8O1 | -146                                              | -64                                                | 1.038        | 2.226                      | 0.735                  | -147                                              | -41                                                | 1.085        | 2.297                      |
| T3T8O2 | -152                                              | -63                                                | 1.041        | 2.024                      | 0.712                  | -118                                              | -36                                                | 1.111        | 1.885                      |
| T7T8O1 | -137                                              | -69                                                | 1.044        | 1.951                      | 0.709                  | -111                                              | -41                                                | 1.097        | 2.029                      |
| T7T8O2 | -137                                              | -62                                                | 1.034        | 2.307                      | 0.730                  | -136                                              | -48                                                | 1.081        | 2.476                      |
| T2T6O1 | -130                                              | -62                                                | 1.046        | 1.908                      | 0.705                  | -123                                              | -38                                                | 1.089        | 2.250                      |
| T2T6O2 | -122                                              | -55                                                | 1.042        | 1.919                      | 0.702                  | -98                                               | -37                                                | 1.112        | 1.959                      |
| T6T2O1 | -130                                              | -58                                                | 1.032        | 2.187                      | 0.729                  | -122                                              | -36                                                | 1.086        | 2.188                      |
| T6T2O2 | -142                                              | -61                                                | 1.038        | 2.123                      | 0.720                  | -141                                              | -37                                                | 1.085        | 2.593                      |
| T4T7O1 | -168                                              | -56                                                | 1.057        | 1.770                      | 0.700                  | -167                                              | -34                                                | 1.104        | 1.867                      |
| T4T7O2 | -118                                              | -61                                                | 1.036        | 2.184                      | 0.722                  | -122                                              | -35                                                | 1.084        | 2.450                      |
| T2T3O1 | -205                                              | -63                                                | 1.039        | 2.286                      | 0.666                  | -197                                              | -37                                                | 1.113        | 1.791                      |
| T3T2O1 | -153                                              | -67                                                | 1.071        | 1.671                      | 0.720                  | -148                                              | -39                                                | 1.097        | 2.241                      |

\*The adsorption complex of propyne on T8T8O2 structure cannot not be stabilized due to the proximity of O1 atom that has higher basicity than O2 atom, and the complex geometry optimization always results propyne adsorption on O1 atom.

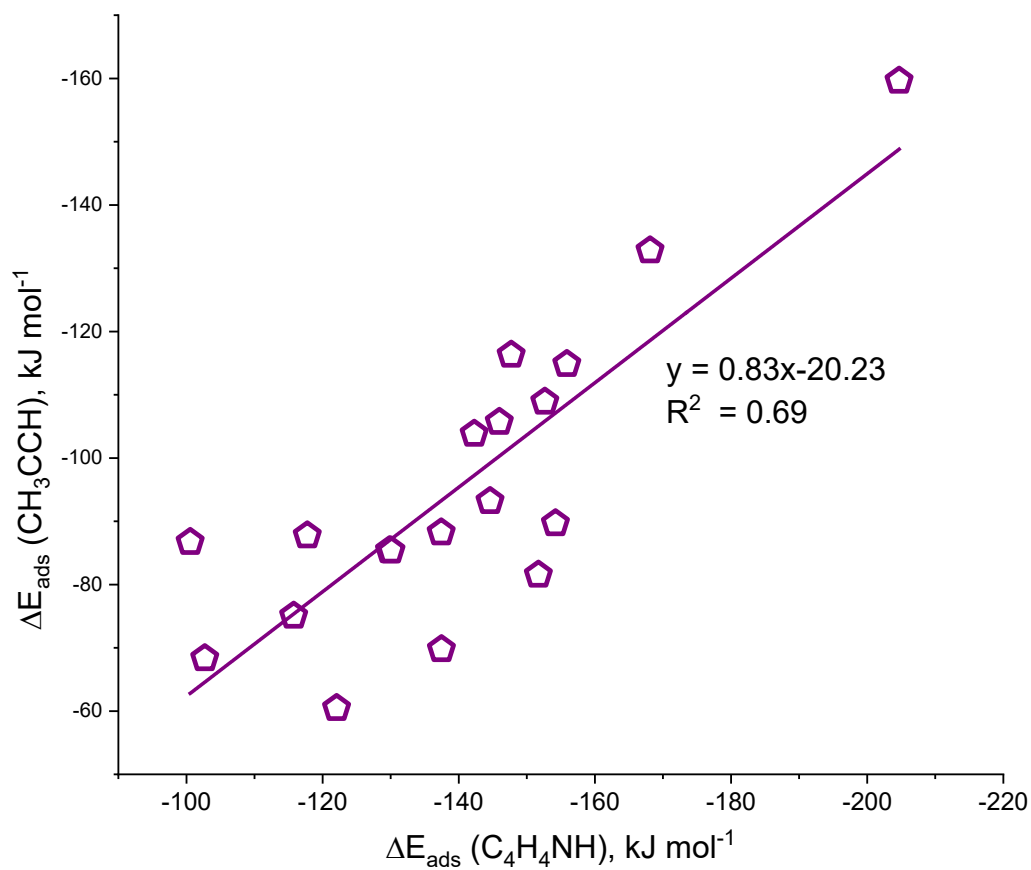

**Figure S11.** Relations of the adsorption energies of pyrrole and propyne.

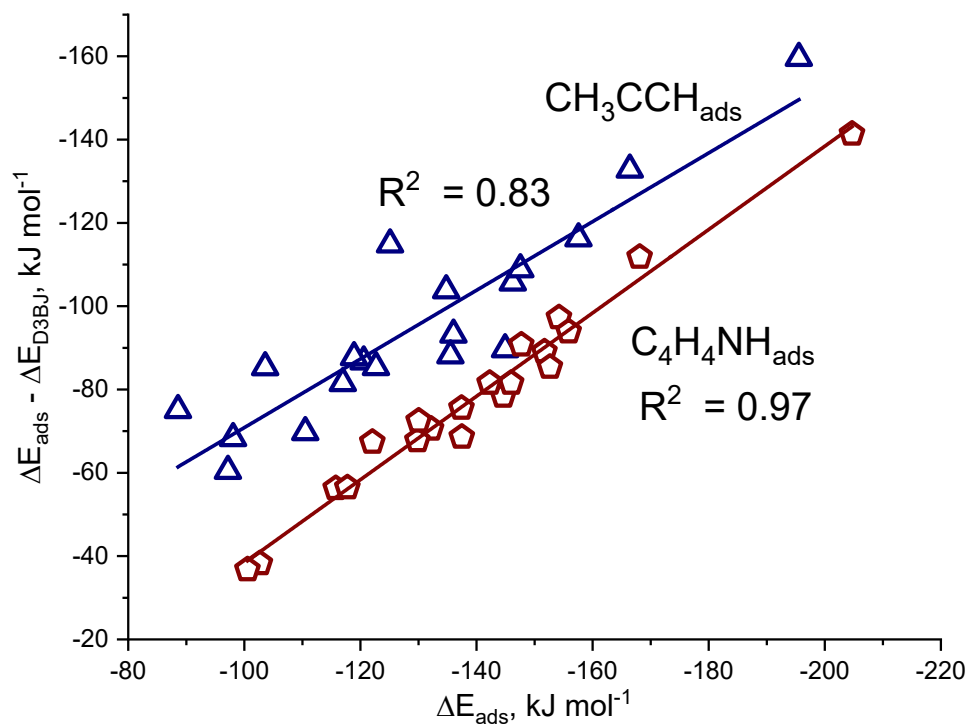

**Figure S12.** Demonstration of the dispersion effects on the pyrrole and propyne adsorption energies for various locations in Zn-BEA zeolite

T6T6(O1)

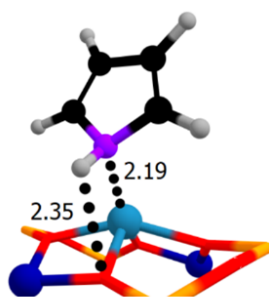

T6T6(O2)

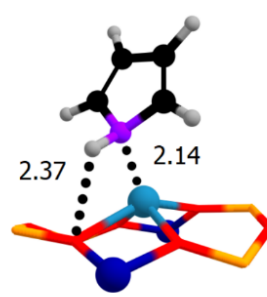

T6T8(O1)

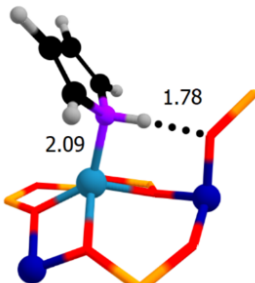

T6T8(O2)

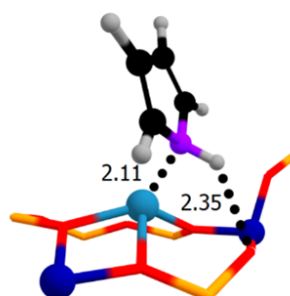

T8T8(O1)

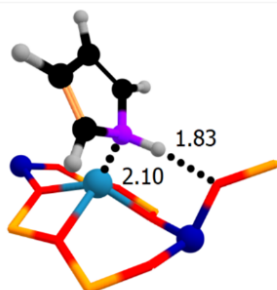

T8T8(O2)

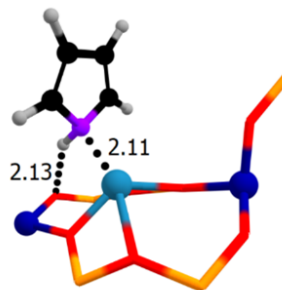

Figure S13. Geometries of the pyrrole adsorption complexes of T6T6, T6T8 and T8T8 configurations.

T3T6(O1)

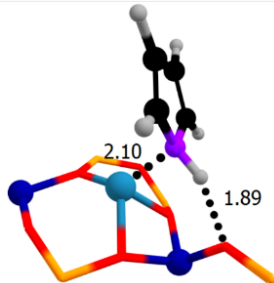

T3T6(O2)

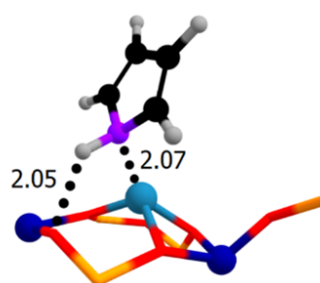

T3T8(O1)

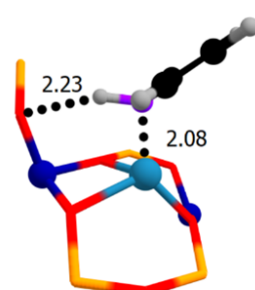

T3T8(O2)

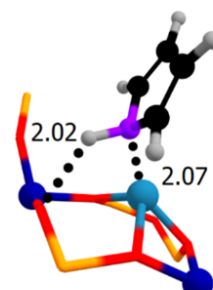

T7T8(O1)

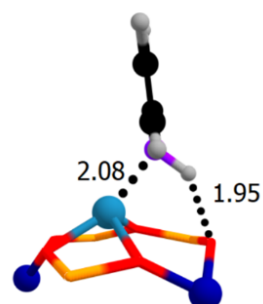

T7T8(O2)

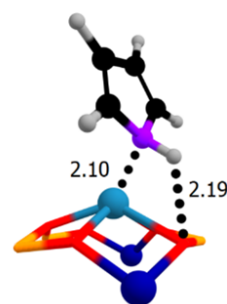



**Figure S14.** Geometries of the pyrrole adsorption complexes of T3T6, T3T8 and T7T8 configurations.

**T2T6(O1)**

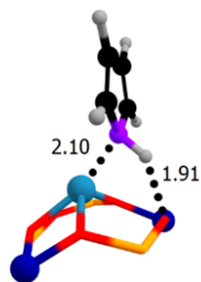

**T2T6(O2)**

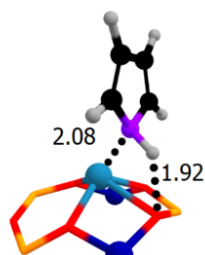

**T6T2(O1)**

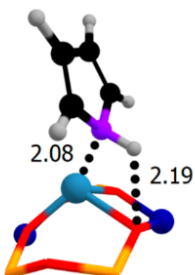

**T6T2(O2)**

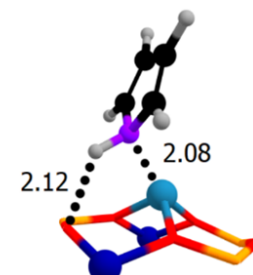

**T4T7(O1)**

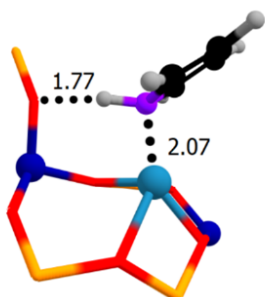

**T4T7(O2)**

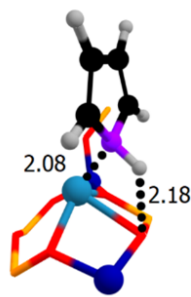

**T2T3O1**

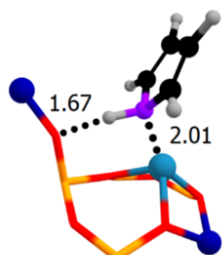

**T3T2O1**

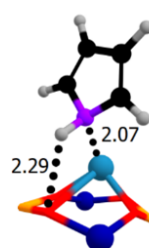

**Figure S15.** Geometries of the pyrrole adsorption complexes of T2T6, T6T2, T4T7, T2T3 and T3T2 configurations.

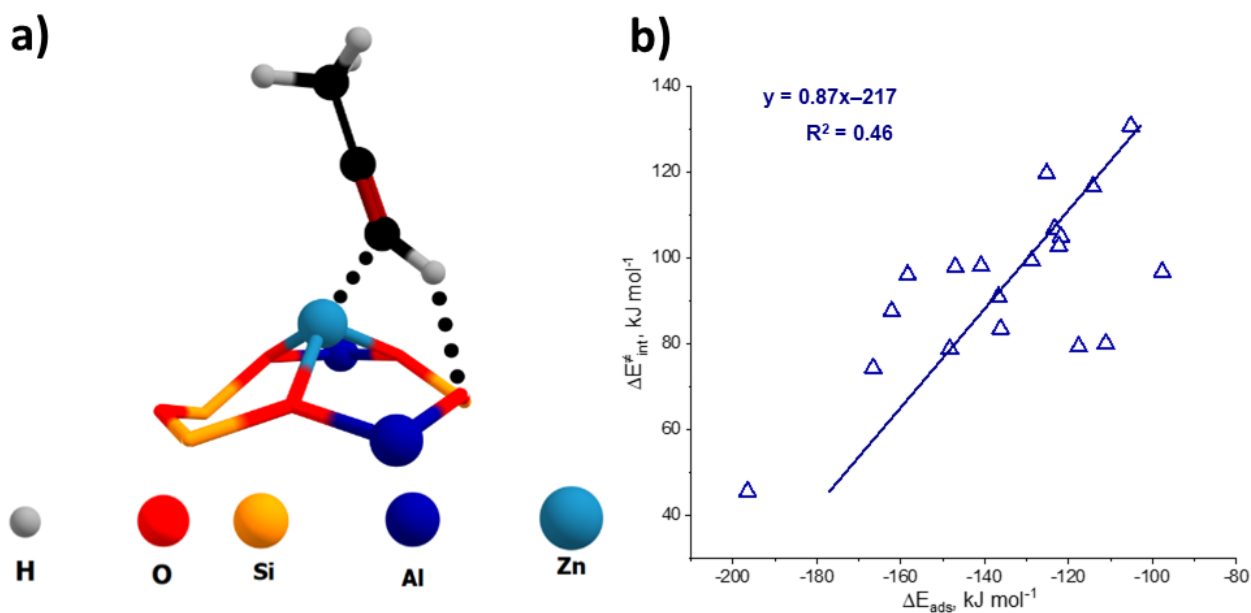

**Figure S16.** Geometry of the propyne adsorption complex (a). Correlations between intrinsic activation barrier and propyne adsorption energies (b).

**Table S9.** Scaled N–H and C–H vibrational frequencies for pyrrole and methylacetylene respectively.

| Configuration | $\nu(\text{N-H})$ | $\nu(\text{C-H})$ | Configuration | $\nu(\text{N-H})$ | $\nu(\text{C-H})$ |
|---------------|-------------------|-------------------|---------------|-------------------|-------------------|
| T6T6O1        | 3278              | 3186              | T7T8O1        | 3040              | 2774              |
| T6T6O2        | 3273              | 3174              | T7T8O2        | 3228              | 2971              |
| T6T8O1        | 2783              | 2673              | T2T6O1        | 3006              | 3191              |
| T6T8O2        | 3179              | 3111              | T2T6O2        | 3073              | 3087              |
| T8T8O1        | 2889              | 2862              | T6T2O1        | 3238              | 2788              |
| T8T8O2        | 3128              | *                 | T6T2O2        | 3144              | 3137              |
| T3T6O1        | 3017              | 3027              | T4T7O1        | 2811              | 3139              |
| T3T6O2        | 3122              | 3083              | T4T7O2        | 3193              | 2862              |
| T3T8O1        | 3146              | 3138              | T2T3O1        | 2610              | 2983              |
| T3T8O2        | 3101              | 3186              | T3T2O1        | 3160              | 3154              |

\*The adsorption complex of propyne on T8T8O2 structure cannot not be stabilized due to the proximity of O1 atom that has higher basicity than O2 atom, and the complex geometry optimization always results propyne adsorption on O1 atom.

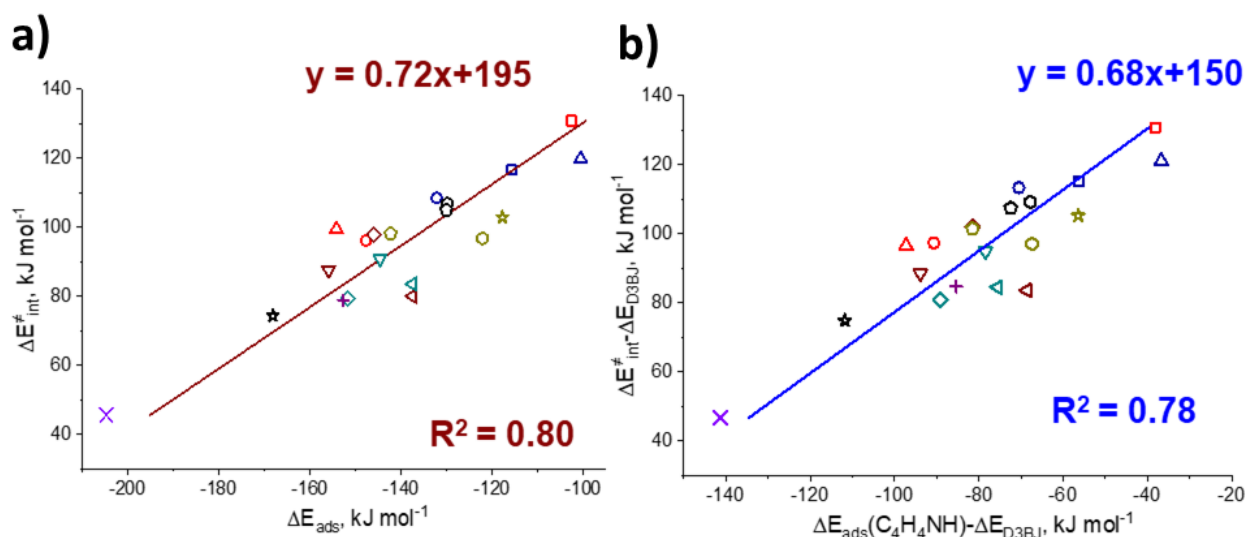

**Figure S17.** Correlations between intrinsic activation barrier and pyrrole adsorption energies for Zn-BEA with (a) and without (b) dispersion interactions.

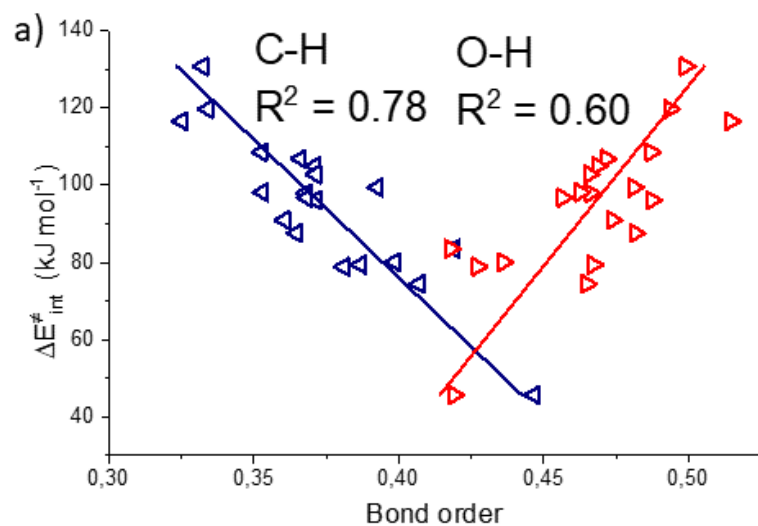

**Figure S18.** Relations between the activation barriers and bond orders of the O–H and C–H bonds in the methane activation transition state geometries.

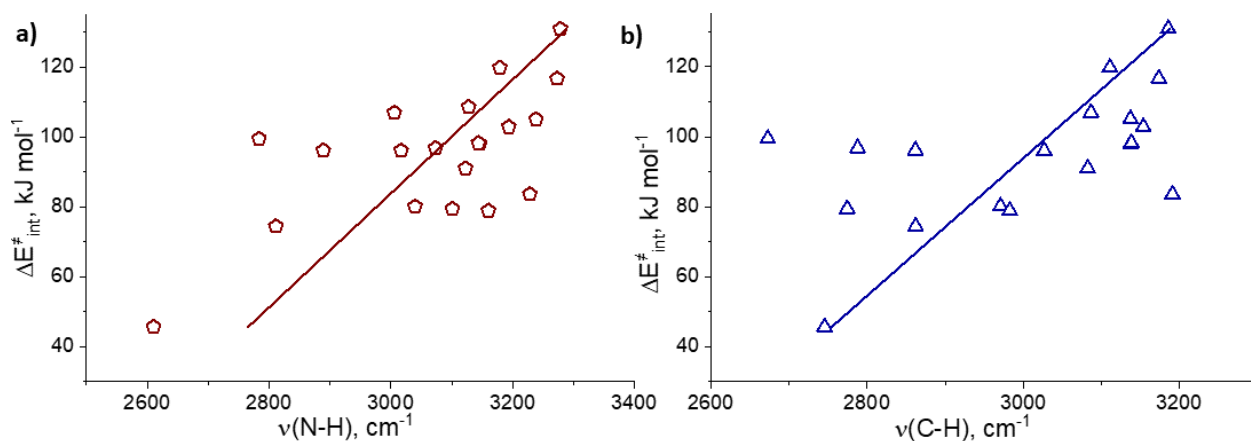

**Figure S19.** Relations between activation barriers and N–H (a) or C–H (b) frequencies of pyrrole and propyne adsorption complexes. All values are listed in Table S16

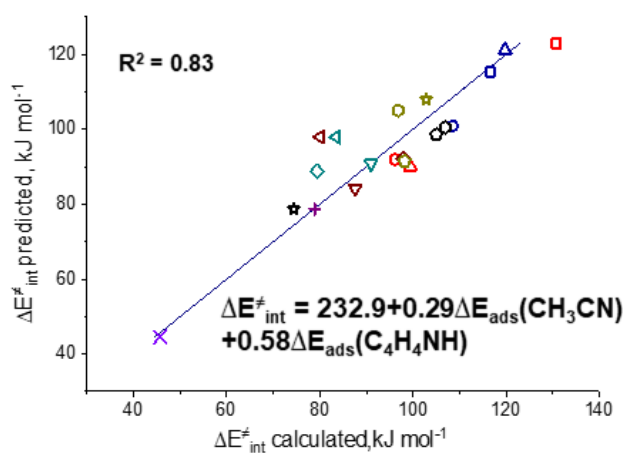

**Figure S20.** Two-dimensional correlations between the  $\Delta E_{int}^{\ddagger}$  and the linear combination of  $\Delta E_{ads}$  ( $\text{CH}_3\text{CN}$ ) and  $\Delta E_{ads}$  ( $\text{C}_4\text{H}_4\text{NH}$ ).

**Table S10.** *p*-values for the coefficients in the respective linear relations. The coefficient is statistically significant if  $p < 0.05$ .

| Correlation                                                                                                                        | p-values                                                                                           |
|------------------------------------------------------------------------------------------------------------------------------------|----------------------------------------------------------------------------------------------------|
| $\Delta E_{int}^{\ddagger} = 232.9 + 0.29\Delta E_{ads}(\text{CH}_3\text{CN}) + 0.58\Delta E_{ads}(\text{C}_4\text{H}_4\text{NH})$ | $10^{-5}$ ( $E_{ads}(\text{C}_4\text{H}_4\text{NH})$ ); $0.06$ ( $E_{ads}(\text{CH}_3\text{CN})$ ) |
| $\Delta E_{int}^{\ddagger} = 149.6 + 0.13E_H + 0.57\Delta E_{ads}(\text{C}_4\text{H}_4\text{NH})$                                  | $10^{-5}$ ( $\text{C}_4\text{H}_4\text{NH}$ ); $10^{-3}$ ( $E_H$ )                                 |

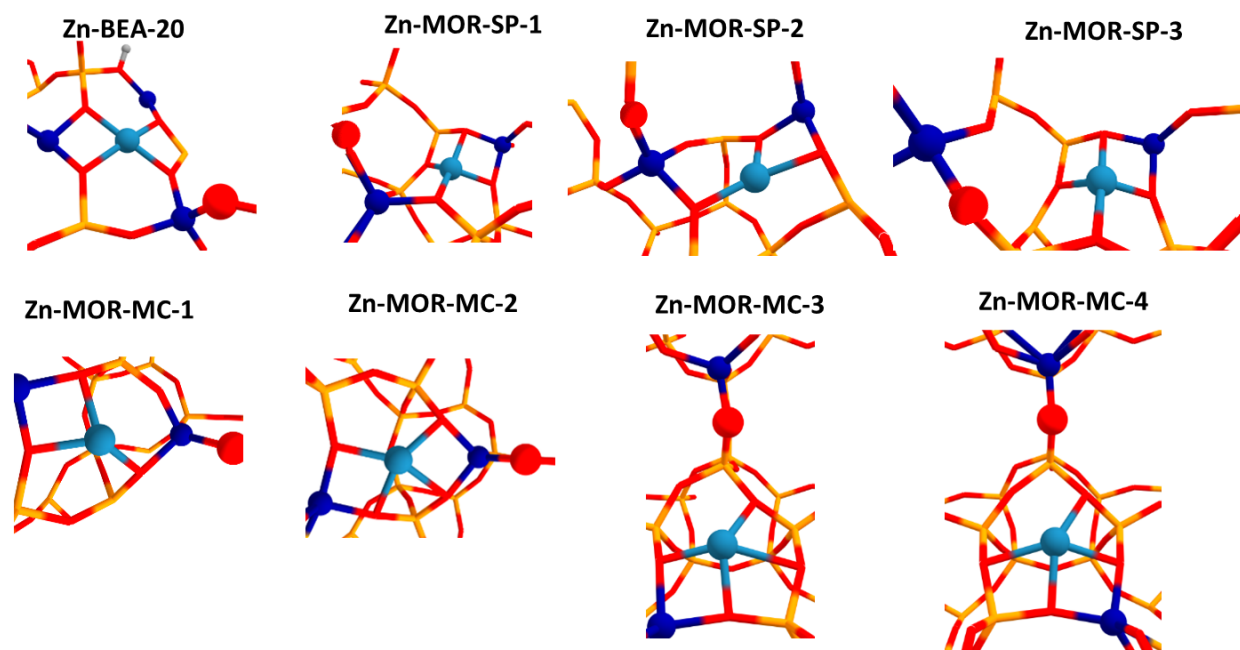

**Figure S21.** The structures of the additional zeolite models.

**Table S11.** DFT-calculated and predicted using the obtained correlation activation barriers for methane activation. All values are given in  $\text{kJ mol}^{-1}$ .

|               | DFT-<br>Calculated<br>$\Delta E_{\text{int}}^\ddagger$ | $\Delta E_{\text{int}}^\ddagger(\Delta E_{\text{ads}}[\text{C}_4\text{H}_4\text{NH}])$ | $\Delta E_{\text{int}}^\ddagger$<br>( $\Delta E_{\text{ads}}[\text{C}_4\text{H}_4\text{NH}]$ ,<br>$\Delta E_{\text{ads}}[\text{CH}_3\text{CN}]$ ) | $\Delta E_{\text{int}}^\ddagger(\Delta E_{\text{ads}}[\text{C}_4\text{H}_4\text{NH}]$ ,<br>$E_{\text{H}}$ ) |
|---------------|--------------------------------------------------------|----------------------------------------------------------------------------------------|---------------------------------------------------------------------------------------------------------------------------------------------------|-------------------------------------------------------------------------------------------------------------|
| Zn-<br>BEA-20 | 93                                                     | 86                                                                                     | 93                                                                                                                                                | 90                                                                                                          |
| Zn-<br>MOR    | 82                                                     | 101                                                                                    | 117                                                                                                                                               | 99                                                                                                          |

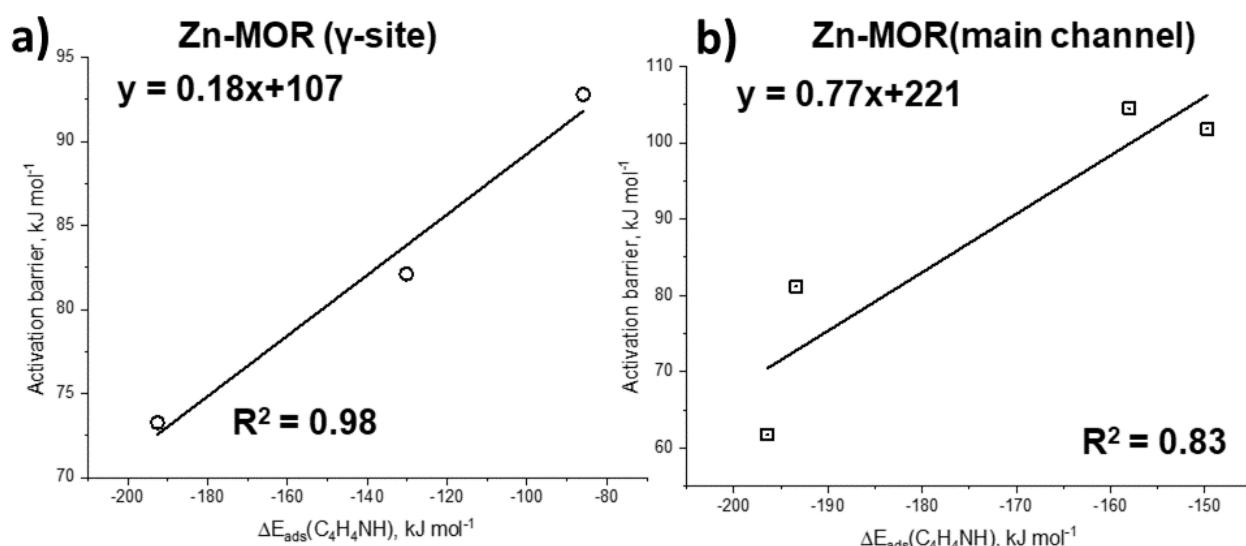

**Figure S22.** Correlations between intrinsic activation barrier and pyrrole adsorption energies for different Zn sites in the  $\gamma$ -site of Zn-MOR “side pocket” (a) and in the main channel of Zn-MOR (b).

**Table S12.** The number of short ( $D < 2.5 \text{ \AA}$ ) and long ( $D < 3.0 \text{ \AA}$ , in parenthesis)  $\text{CH}\cdots\text{O}$  contacts in the considered pyrrole adsorption complexes.

| System     | n(CH $\cdots$ O) | System     | n(CH $\cdots$ O) |
|------------|------------------|------------|------------------|
| T6T6O1     | 1 (8)            | T7T8O1     | 0 (7)            |
| T6T6O2     | 0 (1)            | T7T8O2     | 0 (2)            |
| T6T8O1     | 0 (2)            | T2T6O1     | 0 (3)            |
| T6T8O2     | 0 (3)            | T2T6O2     | 0 (4)            |
| T8T8O1     | 0 (2)            | T6T2O1     | 0 (3)            |
| T8T8O2     | 0 (3)            | T6T2O2     | 0 (1)            |
| T3T6O1     | 0 (3)            | T4T7O1     | 0 (3)            |
| T3T6O2     | 0 (6)            | T4T7O2     | 0 (4)            |
| T3T8O1     | 0 (2)            | T2T3O1     | 1 (2)            |
| T3T8O2     | 0 (6)            | T3T2O1     | 2 (6)            |
| BEA-3Al    | 0 (0)            | Zn-MOR-SP1 | 4 (13)           |
| Zn-MOR-SP2 | 5(13)            | Zn-MOR-SP3 | 3(14)            |
| Zn-MOR-MC1 | 1(3)             | Zn-MOR-MC2 | 0(0)             |
| Zn-MOR-MC3 | 0(0)             | Zn-MOR-MC4 | 0(0)             |

## References

- (1) Zhidomirov, G. M.; Shubin, A. A.; Kazansky, V. B.; Van Santen, R. A., Possible Molecular Structure of Promoted Lewis Acidity Sites in ZnZSM-5. *Int. J. Quantum Chem.* **2004**, *100*, 489–494.
- (2) Pidko, E. A.; van Santen, R. A., Activation of Light Alkanes Over Zinc Species Stabilized in ZSM-5 Zeolite: A Comprehensive DFT Study. *J. Phys. Chem. C* **2007**, *111*, 2643–2655.
- (3) Liu, C.; Tranca, I.; van Santen, R. A.; Hensen, E. J. M.; Pidko, E. A., Scaling Relations for Acidity and Reactivity of Zeolites. *J. Phys. Chem. C* **2017**, *121*, 23520-23530.
